# Supplementary material for: The effect of side chains on the complex formation processes of N-terminally free hexapeptides containing C-terminal cysteinyl functions
Source: Royal Society of Chemistry journal article supplement (doi:10.1039/d1nj05383c), 2022-01-01
Supplement: d1nj05383c1.pdf [file d1nj05383c1.pdf]

Electronic Supplementary Information in New Journal of Chemistry

The effect of side chains on the complex formation processes of N-terminally free hexapeptides containing C-terminal cysteinyl functions

Ágnes Grenács<sup>a\*</sup>, Nikolett Bodnár<sup>a</sup>, Dóra Csilla Pálinkás<sup>a</sup>, Norbert Lihi<sup>a,b</sup> and Katalin Várnagy<sup>a</sup>

<sup>a.</sup> Department of Inorganic and Analytical Chemistry, University of Debrecen, H-4032 Debrecen, Hungary. E-mail: grenacs.agnes@science.unideb.hu

<sup>b.</sup> MTA-DE Redox and Homogeneous Catalytic Reaction Mechanisms Research Group, University of Debrecen, H-4032 Debrecen, Egyetem tér 1., Hungary

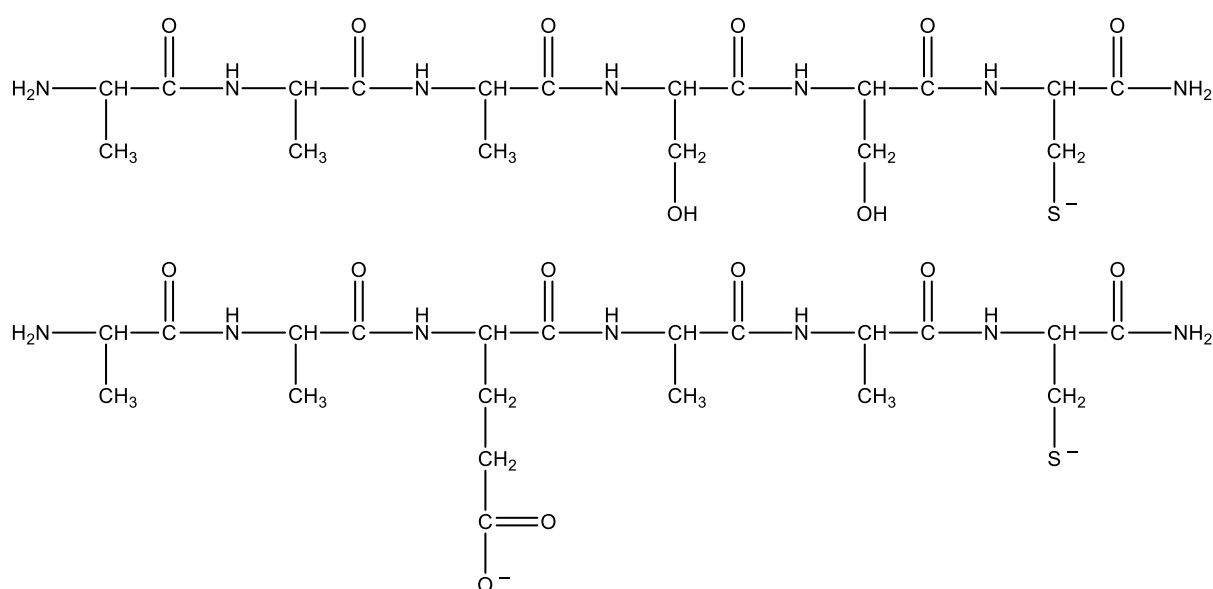

**Scheme S1** Structure of the investigated ligands AAASSC-NH<sub>2</sub> and AAEEAC-NH<sub>2</sub> (deprotonated forms)

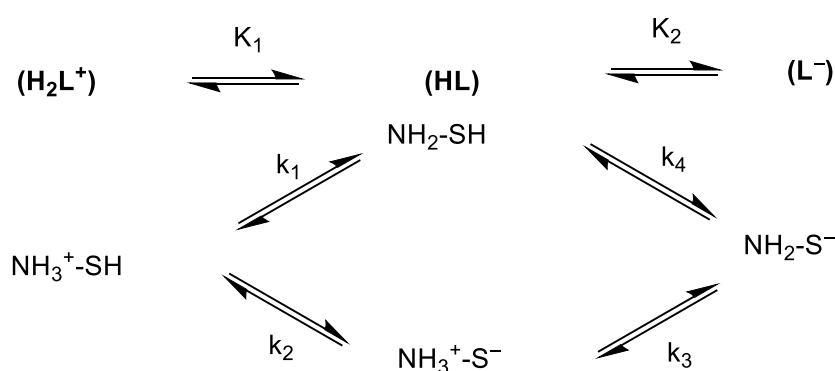

**Scheme S2** Dissociation processes of AAASSC-NH<sub>2</sub>

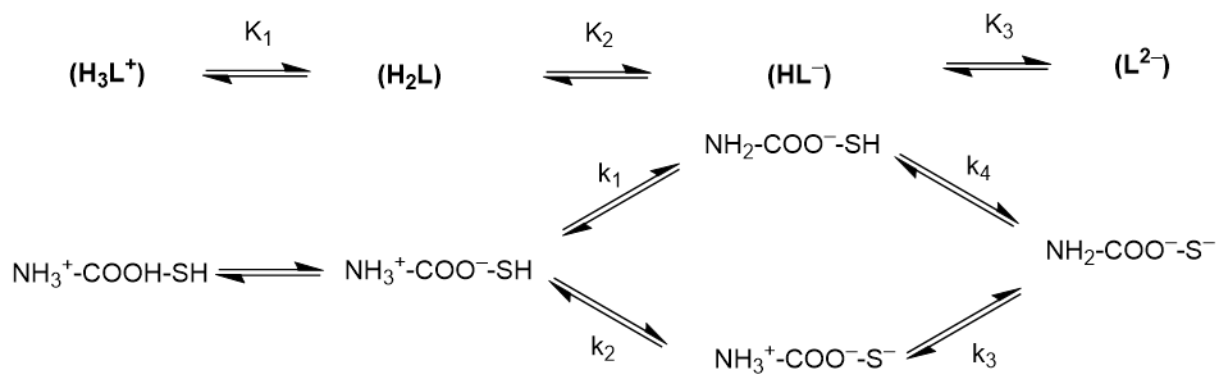

**Scheme S3** Dissociation processes of AAEAAC-NH<sub>2</sub>

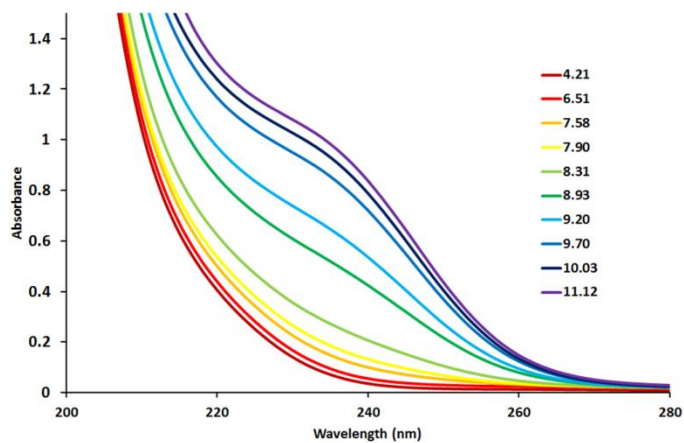

**Figure S1** UV-absorption spectra of the ligand AAEEAC-NH<sub>2</sub> depending on pH ( $c_L = 5$  mM)

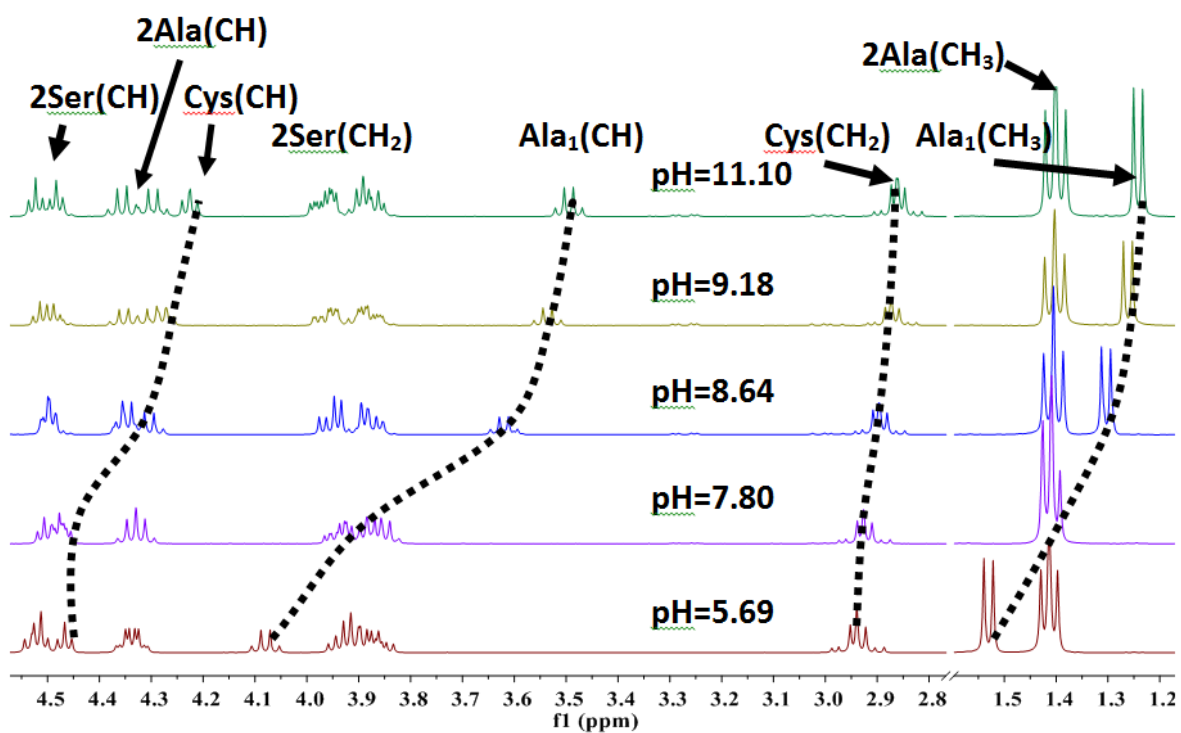

**Figure S2** <sup>1</sup>H NMR spectra ( $c_L = 5$  mM) (b) of the ligand AAASSC-NH<sub>2</sub> depending on pH

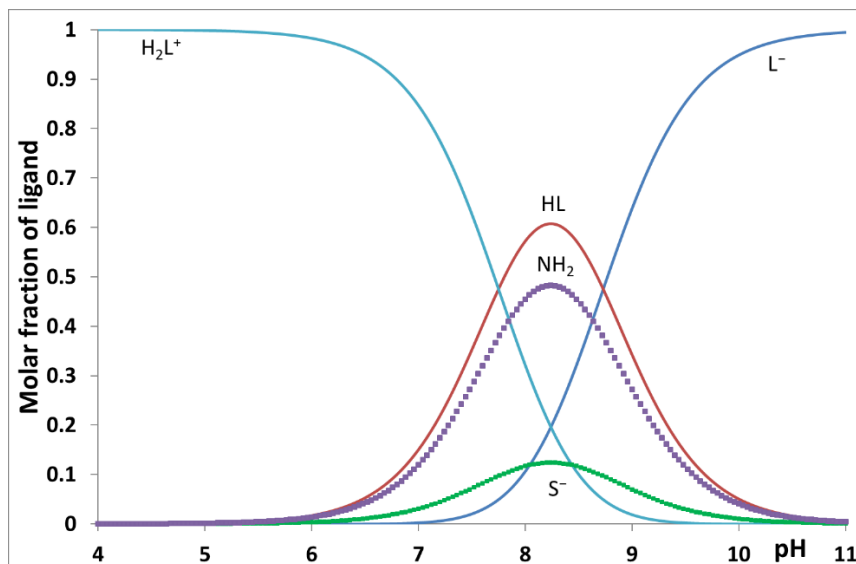

(a)

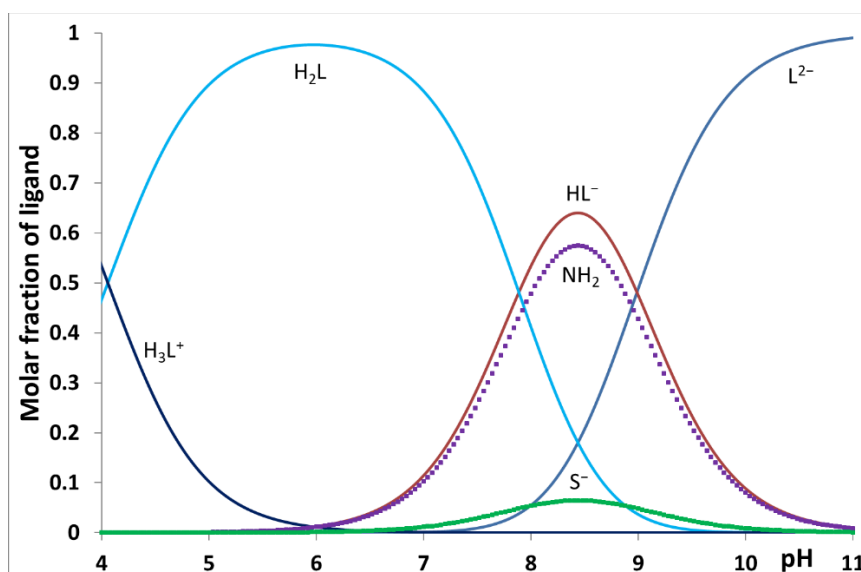

(b)

**Figure S3** Distribution of microspecies as a function of pH for AAASSC-NH<sub>2</sub> (a) and AAEEAC-NH<sub>2</sub> (b)

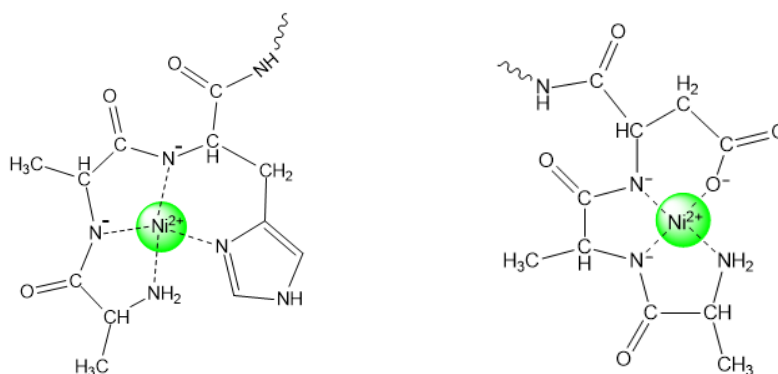

**Figure S4** Supposed structures of the NiH<sub>1</sub>L complexes of AAHAAC-NH<sub>2</sub> with the (NH<sub>2</sub>, N<sup>-</sup>, N<sup>-</sup>, N<sub>Im</sub>) (left) and AADAAC-NH<sub>2</sub> with the (NH<sub>2</sub>, N<sup>-</sup>, N<sup>-</sup>, β-COO<sup>-</sup>) (right) binding mode.

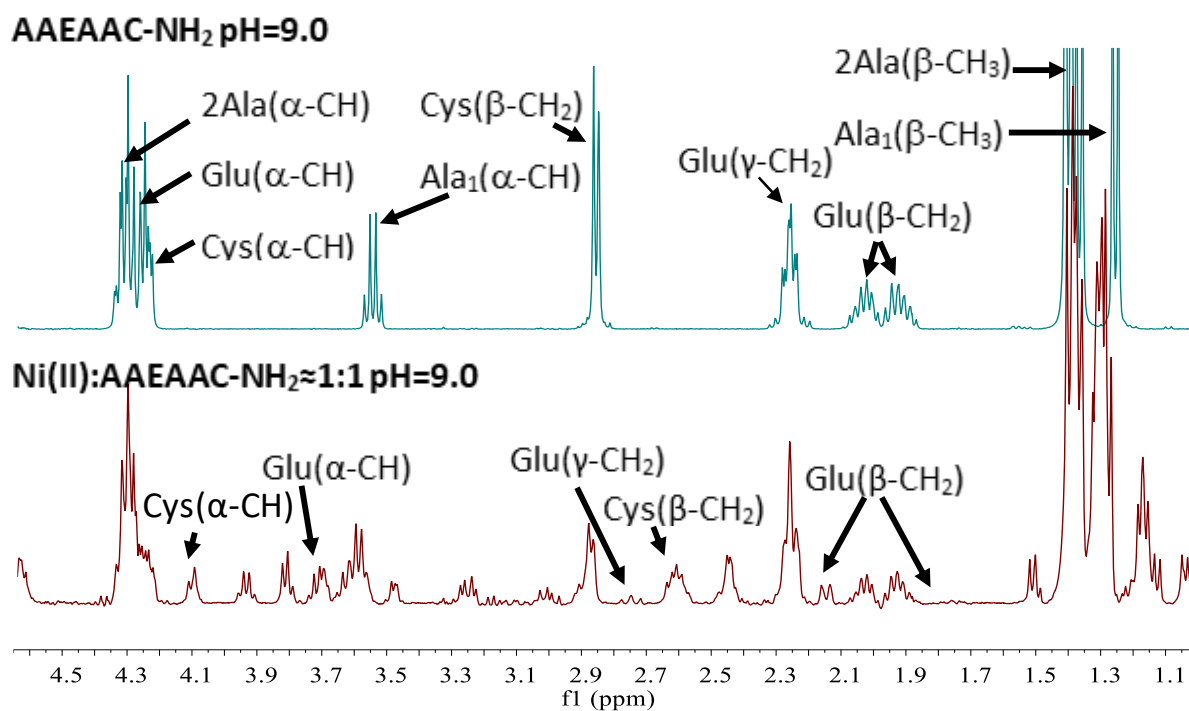

**Figure S5** <sup>1</sup>H NMR spectra of the free ligand AAEAAC-NH<sub>2</sub> and in the presence of equimolar nickel(II) at pH=9 ( $c_L = c_{Ni^{2+}} = 5 \text{ mM}$ )

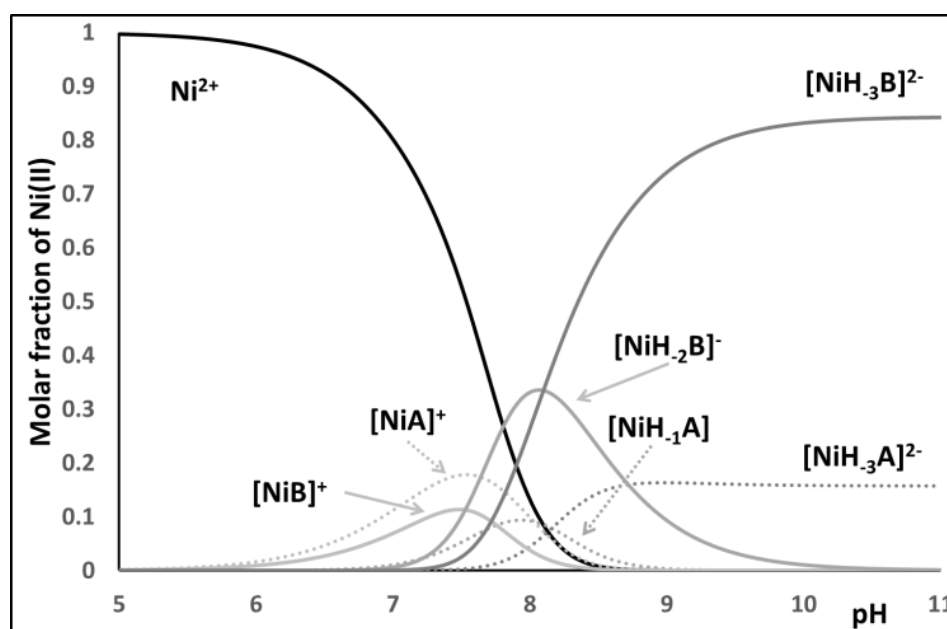

**Figure S6** Hypothetic distribution of nickel(II) complexes formed in the Ni(II) : AAAA : Ac-AAAC-NH<sub>2</sub> = 1:1:1 ( $c = 2 \text{ mM}$ ) (data from ref. [32] (AAAA – A) and [33] (Ac-AAAC-NH<sub>2</sub> - B))

**Table S1** Relative energy values in gas phase and in water simulated by SMD for the formation of coordination isomers in the NiH<sub>3</sub>L complexes.<sup>a</sup>

|                                                                                                                                                                                                               | $\Delta E^{ele}$ | $\Delta G^{therm}$ | $\Delta G_{gas}^{tot}$ | $\Delta(\Delta G^{solv})$ | $\Delta G_{aq}^{tot}$ |
|---------------------------------------------------------------------------------------------------------------------------------------------------------------------------------------------------------------|------------------|--------------------|------------------------|---------------------------|-----------------------|
| NiH <sub>3</sub> L (NH <sub>2</sub> ,N <sup>-</sup> , N <sup>-</sup> , N <sup>-</sup> ) → NiH <sub>3</sub> L (N <sup>-</sup> ,N <sup>-</sup> , N <sup>-</sup> , S <sup>-</sup> )<br>L: AAASSC-NH <sub>2</sub> | -28.4            | -26.2              | 5.7                    | -36.8                     | -31.1                 |
| NiH <sub>3</sub> L (NH <sub>2</sub> ,N <sup>-</sup> , N <sup>-</sup> , N <sup>-</sup> ) → NiH <sub>3</sub> L (N <sup>-</sup> ,N <sup>-</sup> , N <sup>-</sup> , S <sup>-</sup> )<br>L: AAEEAC-NH <sub>2</sub> | 0.7              | 2.2                | 101.1                  | -97.4                     | 3.7                   |

<sup>a</sup> Values are reported in kJ/mol. Thermal contribution at 298 K and zero-point energies are included in the calculations.

**Table S2** Energies and Cartesian coordinates of the NiH<sub>3</sub>L complex with (NH<sub>2</sub>,N<sup>-</sup>,N<sup>-</sup>,N<sup>-</sup>) donors in gas phase. L refers to AAASSC-NH<sub>2</sub>.

|                                                  |              |
|--------------------------------------------------|--------------|
| Sum of electronic and zero-point Energies (Eh)   | -3600.917041 |
| Sum of electronic and thermal Energies (Eh)      | -3600.879962 |
| Sum of electronic and enthalpy Energies (Eh)     | -3600.879018 |
| Sum of electronic and thermal Free Energies (Eh) | -3600.990706 |
| Number of Imaginary Frequencies                  | 0            |

### Molecular Geometry in Cartesian Coordinates

|   |           |           |           |
|---|-----------|-----------|-----------|
| N | 2.376047  | 1.835521  | -0.441330 |
| H | 1.576140  | 1.870711  | -1.064424 |
| C | 3.366886  | 2.886093  | -0.781786 |
| H | 3.357010  | 2.979430  | -1.871983 |
| C | 3.047587  | 4.230503  | -0.161664 |
| C | 4.788486  | 2.410618  | -0.426139 |
| H | 2.103904  | 4.637643  | -0.533625 |
| H | 2.982103  | 4.143622  | 0.926874  |
| H | 3.857086  | 4.923548  | -0.389801 |
| O | 5.730609  | 3.210823  | -0.507226 |
| N | 4.807361  | 1.129507  | -0.110127 |
| C | 6.027601  | 0.393077  | 0.141112  |
| H | 6.740702  | 0.563168  | -0.675551 |
| C | 6.703193  | 0.780029  | 1.450543  |
| C | 5.677299  | -1.103464 | 0.153190  |
| H | 6.006097  | 0.645923  | 2.281594  |
| H | 7.568142  | 0.135498  | 1.616017  |
| H | 7.017649  | 1.823616  | 1.417330  |
| O | 6.555581  | -1.962921 | 0.289684  |
| N | 4.366145  | -1.310126 | 0.028388  |
| C | 3.745951  | -2.608544 | 0.069971  |
| H | 4.181549  | -3.268125 | -0.692674 |
| C | 3.881961  | -3.293457 | 1.425002  |
| C | 2.263019  | -2.440448 | -0.279025 |
| H | 3.458078  | -2.656108 | 2.204493  |
| H | 3.333225  | -4.236341 | 1.411940  |
| H | 4.934370  | -3.472805 | 1.644079  |
| O | 1.526900  | -3.429314 | -0.321165 |
| N | 1.914574  | -1.164233 | -0.523139 |
| C | 0.556172  | -0.841242 | -0.868890 |
| H | 0.583655  | 0.061492  | -1.492982 |
| C | -0.196306 | -1.852807 | -1.774653 |
| C | -0.319798 | -0.493392 | 0.338978  |

|    |           |           |           |
|----|-----------|-----------|-----------|
| H  | 0.528769  | -2.255403 | -2.482102 |
| H  | -0.584624 | -2.686843 | -1.193453 |
| O  | -1.219408 | -1.205626 | -2.522930 |
| O  | -0.072530 | -0.783526 | 1.492598  |
| H  | -2.078436 | -1.318942 | -2.083676 |
| N  | -1.459146 | 0.182807  | -0.012511 |
| H  | -1.668476 | 0.192502  | -1.003093 |
| C  | -2.605707 | 0.174521  | 0.854866  |
| H  | -2.436508 | -0.608275 | 1.606695  |
| C  | -2.742504 | 1.501077  | 1.607141  |
| C  | -3.843877 | -0.212888 | 0.028371  |
| H  | -1.738068 | 1.823230  | 1.897481  |
| H  | -3.190365 | 2.262495  | 0.966798  |
| O  | -3.589010 | 1.402220  | 2.745716  |
| O  | -3.715040 | -0.729286 | -1.079412 |
| H  | -3.203781 | 0.746303  | 3.336284  |
| N  | -5.016008 | 0.036177  | 0.616846  |
| H  | -4.983349 | 0.569288  | 1.476689  |
| C  | -6.299638 | -0.065914 | -0.045518 |
| H  | -6.189384 | -0.760196 | -0.879175 |
| C  | -7.358395 | -0.631524 | 0.923993  |
| C  | -6.680185 | 1.315086  | -0.601856 |
| H  | -6.890834 | -1.498969 | 1.398314  |
| H  | -7.521233 | 0.111253  | 1.717212  |
| S  | -8.936834 | -1.128872 | 0.173290  |
| O  | -5.967493 | 2.300945  | -0.450579 |
| N  | -7.852878 | 1.321821  | -1.259994 |
| H  | -8.222249 | 2.236918  | -1.468624 |
| H  | -8.504484 | 0.531728  | -1.023141 |
| H  | 2.013080  | 1.992984  | 0.496003  |
| Ni | 3.283556  | 0.108637  | -0.282085 |

**Table S3** Energies and Cartesian coordinates of the NiH<sub>3</sub>L complex with (NH<sub>2</sub>,N<sup>-</sup>,N<sup>-</sup>,N<sup>-</sup>) donors in water. L refers to AAASSC-NH<sub>2</sub>.

|                                                  |              |
|--------------------------------------------------|--------------|
| Sum of electronic and zero-point Energies (Eh)   | -3601.164824 |
| Sum of electronic and thermal Energies (Eh)      | -3601.128015 |
| Sum of electronic and enthalpy Energies (Eh)     | -3601.127071 |
| Sum of electronic and thermal Free Energies (Eh) | -3601.235679 |
| Number of Imaginary Frequencies                  | 0            |

#### Molecular Geometry in Cartesian Coordinates

|   |          |          |           |
|---|----------|----------|-----------|
| N | 2.554974 | 1.891612 | -0.528360 |
| H | 1.860403 | 1.966520 | -1.264961 |
| C | 3.653081 | 2.857548 | -0.792286 |
| H | 3.699247 | 2.994091 | -1.876151 |
| C | 3.409423 | 4.197427 | -0.130748 |
| C | 4.988455 | 2.235220 | -0.403829 |
| H | 2.483341 | 4.643090 | -0.497076 |
| H | 3.335662 | 4.084760 | 0.953798  |
| H | 4.227797 | 4.882762 | -0.350857 |
| O | 6.043297 | 2.906474 | -0.484544 |
| N | 4.882545 | 0.970148 | -0.056181 |
| C | 6.029260 | 0.123276 | 0.214014  |
| H | 6.779079 | 0.243131 | -0.577207 |

|    |           |           |           |
|----|-----------|-----------|-----------|
| C  | 6.692811  | 0.406411  | 1.555941  |
| C  | 5.536694  | -1.320680 | 0.174471  |
| H  | 5.979742  | 0.273489  | 2.372705  |
| H  | 7.528985  | -0.276568 | 1.713429  |
| H  | 7.073125  | 1.427247  | 1.590143  |
| O  | 6.343706  | -2.275815 | 0.260761  |
| N  | 4.222472  | -1.412902 | 0.064114  |
| C  | 3.494788  | -2.658341 | 0.067239  |
| H  | 3.892316  | -3.340546 | -0.694741 |
| C  | 3.531338  | -3.364152 | 1.418529  |
| C  | 2.049900  | -2.350421 | -0.313769 |
| H  | 3.105219  | -2.724274 | 2.194458  |
| H  | 2.956745  | -4.290232 | 1.379315  |
| H  | 4.557004  | -3.607543 | 1.694285  |
| O  | 1.243444  | -3.300281 | -0.416773 |
| N  | 1.788792  | -1.055373 | -0.493590 |
| C  | 0.453103  | -0.611890 | -0.836126 |
| H  | 0.550746  | 0.369208  | -1.303441 |
| C  | -0.305818 | -1.447465 | -1.895878 |
| C  | -0.456477 | -0.453531 | 0.373112  |
| H  | 0.411335  | -1.742276 | -2.663240 |
| H  | -0.730937 | -2.349400 | -1.458006 |
| O  | -1.314721 | -0.680049 | -2.529876 |
| O  | -0.409265 | -1.197457 | 1.349650  |
| H  | -2.090829 | -0.635931 | -1.932781 |
| N  | -1.363977 | 0.541414  | 0.255962  |
| H  | -1.372812 | 1.047806  | -0.618435 |
| C  | -2.577109 | 0.573731  | 1.028311  |
| H  | -2.450415 | -0.129735 | 1.855553  |
| C  | -2.802789 | 1.966258  | 1.625806  |
| C  | -3.743247 | 0.053730  | 0.177515  |
| H  | -1.866030 | 2.292449  | 2.082744  |
| H  | -3.068573 | 2.677826  | 0.842494  |
| O  | -3.855991 | 1.994965  | 2.575427  |
| O  | -3.549354 | -0.526439 | -0.899034 |
| H  | -3.576001 | 1.490987  | 3.349787  |
| N  | -4.955404 | 0.232245  | 0.694106  |
| H  | -5.020483 | 0.784090  | 1.544718  |
| C  | -6.185320 | -0.234552 | 0.070859  |
| H  | -5.972023 | -1.176208 | -0.434260 |
| C  | -7.247755 | -0.459491 | 1.138238  |
| C  | -6.657847 | 0.797981  | -0.949987 |
| H  | -6.820552 | -1.147996 | 1.873002  |
| H  | -7.406521 | 0.493937  | 1.653795  |
| S  | -8.808133 | -1.107962 | 0.472072  |
| O  | -6.933599 | 1.951010  | -0.605344 |
| N  | -6.703053 | 0.397323  | -2.220231 |
| H  | -7.041157 | 1.027277  | -2.931852 |
| H  | -6.509383 | -0.559342 | -2.465453 |
| H  | 2.077938  | 2.151079  | 0.333116  |
| Ni | 3.272773  | 0.109314  | -0.252121 |

**Table S4** Energies and Cartesian coordinates of the NiH<sub>3</sub>L complex with (N<sup>-</sup>,N<sup>-</sup>,N<sup>-</sup>,S<sup>-</sup>) donors in gas phase. L refers to AAASSC-NH<sub>2</sub>.

|                                                |              |
|------------------------------------------------|--------------|
| Sum of electronic and zero-point Energies (Eh) | -3600.914123 |
| Sum of electronic and thermal Energies (Eh)    | -3600.876427 |
| Sum of electronic and enthalpy Energies (Eh)   | -3600.875483 |



Sum of electronic and thermal Free Energies (Eh) -3600.988525

Number of Imaginary Frequencies

0

### Molecular Geometry in Cartesian Coordinates

|   |           |           |           |
|---|-----------|-----------|-----------|
| N | 9.849289  | -1.152708 | 0.723385  |
| H | 9.569758  | -2.129481 | 0.788266  |
| C | 8.657250  | -0.363118 | 0.992576  |
| H | 8.568047  | -0.255426 | 2.081605  |
| C | 8.804457  | 1.024071  | 0.390236  |
| C | 7.378550  | -1.105474 | 0.550667  |
| H | 8.817611  | 0.971033  | -0.701822 |
| H | 7.996050  | 1.695607  | 0.678704  |
| H | 9.744492  | 1.467171  | 0.723738  |
| O | 7.431549  | -2.291677 | 0.242562  |
| N | 6.248517  | -0.394597 | 0.586065  |
| H | 6.233282  | 0.609932  | 0.741458  |
| C | 4.943762  | -0.882050 | 0.205461  |
| H | 5.029696  | -1.441753 | -0.730215 |
| C | 4.327739  | -1.784690 | 1.268238  |
| C | 4.094048  | 0.380685  | -0.035652 |
| H | 4.204848  | -1.236973 | 2.204486  |
| H | 3.347678  | -2.142286 | 0.951425  |
| H | 4.976674  | -2.643654 | 1.440102  |
| O | 4.552659  | 1.487080  | 0.269703  |
| N | 2.901443  | 0.161360  | -0.554850 |
| H | 2.488582  | -0.765661 | -0.753464 |
| C | 1.865743  | 1.147521  | -0.778949 |
| H | 1.822040  | 1.806443  | 0.089331  |
| C | 2.164258  | 1.963563  | -2.030370 |
| C | 0.561819  | 0.287700  | -0.916900 |
| H | 2.156712  | 1.313127  | -2.907381 |
| H | 1.415809  | 2.740566  | -2.178296 |
| H | 3.145594  | 2.434328  | -1.943031 |
| O | 0.773853  | -0.926170 | -1.111239 |
| N | -0.625168 | 0.854838  | -0.835566 |
| C | -0.800407 | 2.238060  | -0.427940 |
| H | 0.124852  | 2.716871  | -0.095740 |
| C | -1.340450 | 3.102542  | -1.574221 |
| C | -1.777026 | 2.302222  | 0.757120  |
| H | -1.496305 | 4.115170  | -1.189696 |
| H | -0.573424 | 3.149124  | -2.362920 |
| O | -2.561123 | 2.669854  | -2.120736 |
| O | -1.803095 | 3.306755  | 1.484218  |
| H | -2.587346 | 1.697785  | -2.076168 |
| N | -2.530574 | 1.213707  | 0.802717  |
| C | -3.677784 | 1.049325  | 1.657677  |
| H | -3.386339 | 0.832594  | 2.697756  |
| C | -4.624122 | 2.260675  | 1.714152  |
| C | -4.458575 | -0.155388 | 1.132278  |
| H | -4.066756 | 3.126957  | 2.064775  |
| H | -4.973506 | 2.471380  | 0.692537  |
| O | -5.707571 | 2.024642  | 2.591879  |
| O | -5.595082 | -0.423837 | 1.582473  |
| H | -5.977102 | 1.103678  | 2.379531  |
| N | -3.831939 | -0.840956 | 0.178788  |
| C | -4.559446 | -1.892939 | -0.508641 |
| H | -5.408037 | -1.470857 | -1.057233 |
| C | -3.600930 | -2.579394 | -1.487273 |
| C | -5.146150 | -2.966492 | 0.399351  |

|    |           |           |           |
|----|-----------|-----------|-----------|
| H  | -3.005053 | -3.313856 | -0.938224 |
| H  | -4.174646 | -3.119018 | -2.244167 |
| S  | -2.470139 | -1.393932 | -2.275362 |
| O  | -6.143852 | -3.605444 | 0.108079  |
| N  | -4.388645 | -3.262112 | 1.493798  |
| H  | -4.848121 | -3.801413 | 2.207376  |
| H  | -3.749980 | -2.541203 | 1.793595  |
| H  | 10.096280 | -1.028348 | -0.254129 |
| Ni | -2.278026 | -0.078791 | -0.524255 |

**Table S5** Energies and Cartesian coordinates of the NiH<sub>3</sub>L complex with (N<sup>-</sup>,N<sup>-</sup>,N<sup>-</sup>,S<sup>-</sup>) donors in water. L refers to AAASSC-NH<sub>2</sub>.

|                                                  |              |
|--------------------------------------------------|--------------|
| Sum of electronic and zero-point Energies (Eh)   | -3601.175651 |
| Sum of electronic and thermal Energies (Eh)      | -3601.138009 |
| Sum of electronic and enthalpy Energies (Eh)     | -3601.137065 |
| Sum of electronic and thermal Free Energies (Eh) | -3601.247525 |
| Number of Imaginary Frequencies                  | 0            |

#### Molecular Geometry in Cartesian Coordinates

|   |           |           |           |
|---|-----------|-----------|-----------|
| N | 9.138890  | -1.362902 | 1.628515  |
| H | 8.665337  | -1.520782 | 2.512561  |
| C | 8.310376  | -0.515526 | 0.782191  |
| H | 8.192064  | 0.448703  | 1.280784  |
| C | 8.987777  | -0.299679 | -0.559369 |
| C | 6.927144  | -1.111473 | 0.549826  |
| H | 9.137413  | -1.255040 | -1.067780 |
| H | 8.390282  | 0.343541  | -1.207129 |
| H | 9.961630  | 0.168730  | -0.411324 |
| O | 6.788179  | -2.288394 | 0.195654  |
| N | 5.893135  | -0.285719 | 0.736288  |
| H | 6.062434  | 0.657804  | 1.055259  |
| C | 4.512855  | -0.671442 | 0.530768  |
| H | 4.482232  | -1.379975 | -0.297541 |
| C | 3.904594  | -1.319059 | 1.770683  |
| C | 3.730996  | 0.583105  | 0.170675  |
| H | 3.910478  | -0.621828 | 2.609730  |
| H | 2.876644  | -1.627067 | 1.575706  |
| H | 4.481533  | -2.202530 | 2.045038  |
| O | 3.960801  | 1.650109  | 0.750775  |
| N | 2.789059  | 0.429459  | -0.757480 |
| H | 2.695649  | -0.464445 | -1.219227 |
| C | 1.875290  | 1.483155  | -1.178297 |
| H | 1.825285  | 2.188454  | -0.355064 |
| C | 2.394161  | 2.192489  | -2.419040 |
| C | 0.531810  | 0.776921  | -1.453491 |
| H | 2.521525  | 1.484976  | -3.238996 |
| H | 1.698485  | 2.969443  | -2.740812 |
| H | 3.356909  | 2.660282  | -2.207661 |
| O | 0.581326  | -0.065788 | -2.374001 |
| N | -0.548047 | 1.010790  | -0.714254 |
| C | -0.549220 | 2.146745  | 0.215761  |
| H | 0.321627  | 2.141054  | 0.879085  |
| C | -0.570147 | 3.494696  | -0.506110 |
| C | -1.770696 | 2.089398  | 1.113120  |

|    |           |           |           |
|----|-----------|-----------|-----------|
| H  | -0.631436 | 4.295686  | 0.231538  |
| H  | 0.351747  | 3.632138  | -1.077239 |
| O  | -1.696464 | 3.630872  | -1.360729 |
| O  | -1.889168 | 2.895493  | 2.068271  |
| H  | -1.728018 | 2.837573  | -1.912430 |
| N  | -2.631730 | 1.169412  | 0.746419  |
| C  | -3.906043 | 0.993061  | 1.393031  |
| H  | -3.802481 | 0.863246  | 2.478870  |
| C  | -4.860079 | 2.168737  | 1.155965  |
| C  | -4.518575 | -0.266803 | 0.814253  |
| H  | -4.408681 | 3.087739  | 1.527422  |
| H  | -5.027402 | 2.281164  | 0.077168  |
| O  | -6.088734 | 1.978210  | 1.839001  |
| O  | -5.716954 | -0.561563 | 1.066944  |
| H  | -6.315449 | 1.040422  | 1.663320  |
| N  | -3.705514 | -0.958694 | 0.032263  |
| C  | -4.227732 | -2.139449 | -0.635227 |
| H  | -4.950229 | -1.846016 | -1.403721 |
| C  | -3.060839 | -2.876719 | -1.283281 |
| C  | -4.957278 | -3.121845 | 0.268836  |
| H  | -2.568325 | -3.498692 | -0.532446 |
| H  | -3.425697 | -3.540863 | -2.068678 |
| S  | -1.835977 | -1.715549 | -1.972769 |
| O  | -5.938485 | -3.750450 | -0.144227 |
| N  | -4.416089 | -3.348559 | 1.468364  |
| H  | -4.855909 | -3.999346 | 2.099459  |
| H  | -3.660635 | -2.772623 | 1.803325  |
| H  | 9.217525  | -2.274190 | 1.185599  |
| Ni | -2.127401 | -0.098966 | -0.514878 |

**Table S6** Energies and Cartesian coordinates of the NiH<sub>3</sub>L complex with (NH<sub>2</sub>,N<sup>-</sup>,N<sup>-</sup>,N<sup>-</sup>) donors in gas phase. L refers to AAEAC-NH<sub>2</sub>.

|                                                  |              |
|--------------------------------------------------|--------------|
| Sum of electronic and zero-point Energies (Eh)   | -3677.964158 |
| Sum of electronic and thermal Energies (Eh)      | -3677.924891 |
| Sum of electronic and enthalpy Energies (Eh)     | -3677.923946 |
| Sum of electronic and thermal Free Energies (Eh) | -3678.04298  |
| Number of Imaginary Frequencies                  | 0            |

#### Molecular Geometry in Cartesian Coordinates

|   |           |           |           |
|---|-----------|-----------|-----------|
| N | -1.407269 | -2.354496 | 1.447808  |
| H | -1.860790 | -2.340685 | 2.356139  |
| C | -1.572795 | -3.683597 | 0.826461  |
| H | -0.703858 | -3.833029 | 0.177997  |
| C | -1.631906 | -4.813997 | 1.834934  |
| C | -2.787896 | -3.688250 | -0.118823 |
| H | -2.449138 | -4.650843 | 2.545068  |
| H | -1.833154 | -5.747435 | 1.308487  |
| H | -0.697768 | -4.902244 | 2.395740  |
| O | -3.179497 | -4.761471 | -0.607890 |
| N | -3.235003 | -2.466039 | -0.333776 |
| C | -4.226920 | -2.152525 | -1.337952 |
| H | -4.000764 | -2.695205 | -2.264408 |
| C | -5.644441 | -2.511587 | -0.910344 |
| C | -4.131625 | -0.647019 | -1.643310 |

|    |           |           |           |
|----|-----------|-----------|-----------|
| H  | -5.889831 | -2.002378 | 0.024906  |
| H  | -6.348863 | -2.183169 | -1.677168 |
| H  | -5.731915 | -3.589680 | -0.763140 |
| O  | -4.788863 | -0.154054 | -2.567267 |
| N  | -3.304046 | -0.019372 | -0.808656 |
| C  | -3.027369 | 1.403007  | -0.859190 |
| H  | -2.886187 | 1.726458  | -1.896150 |
| C  | -4.171007 | 2.232311  | -0.232336 |
| C  | -1.712845 | 1.600329  | -0.107738 |
| H  | -5.096295 | 1.840726  | -0.663080 |
| H  | -4.218917 | 2.027982  | 0.839740  |
| C  | -4.109115 | 3.734891  | -0.456714 |
| O  | -0.989970 | 2.589324  | -0.284647 |
| H  | -3.150107 | 4.124829  | -0.099179 |
| H  | -4.146174 | 3.965708  | -1.525722 |
| C  | -5.227001 | 4.559927  | 0.247284  |
| O  | -5.720212 | 4.077791  | 1.291858  |
| O  | -5.503111 | 5.657487  | -0.293789 |
| N  | -1.454480 | 0.604499  | 0.776049  |
| C  | -0.330143 | 0.840600  | 1.663729  |
| H  | -0.105013 | 1.910760  | 1.611169  |
| C  | -0.641566 | 0.484611  | 3.106272  |
| C  | 0.891913  | 0.095209  | 1.141642  |
| H  | -0.820682 | -0.582172 | 3.236423  |
| H  | 0.190241  | 0.759573  | 3.760693  |
| H  | -1.534009 | 1.027428  | 3.419223  |
| O  | 1.171497  | -1.060762 | 1.476421  |
| N  | 1.615268  | 0.792136  | 0.245523  |
| H  | 1.236113  | 1.690386  | -0.033531 |
| C  | 2.666524  | 0.199210  | -0.542200 |
| H  | 2.722726  | -0.842953 | -0.223119 |
| C  | 2.329119  | 0.273237  | -2.029950 |
| C  | 4.024200  | 0.878401  | -0.308251 |
| H  | 2.244352  | 1.315416  | -2.343533 |
| H  | 3.108041  | -0.204726 | -2.627272 |
| H  | 1.377023  | -0.222494 | -2.222062 |
| O  | 4.123674  | 2.084431  | -0.159242 |
| N  | 5.070871  | 0.028315  | -0.353008 |
| H  | 4.913521  | -0.931869 | -0.631346 |
| C  | 6.457937  | 0.429320  | -0.452849 |
| H  | 6.517318  | 1.398442  | -0.955559 |
| C  | 7.133811  | 0.593844  | 0.931120  |
| C  | 7.153041  | -0.635115 | -1.301177 |
| H  | 6.472371  | 1.253266  | 1.495764  |
| H  | 7.116551  | -0.383083 | 1.428859  |
| S  | 8.817548  | 1.291107  | 0.916385  |
| O  | 6.565088  | -1.646997 | -1.683916 |
| N  | 8.443938  | -0.370638 | -1.568190 |
| H  | 8.963200  | -1.163549 | -1.916768 |
| H  | 8.901579  | 0.274556  | -0.862513 |
| H  | -0.422827 | -2.096241 | 1.583313  |
| Ni | -2.326171 | -1.019470 | 0.355098  |

**Table S7** Energies and Cartesian coordinates of the NiH<sub>3</sub>L complex with (NH<sub>2</sub>,N<sup>-</sup>,N<sup>-</sup>,N<sup>-</sup>) donors in water. L refers to AAEEAC-NH<sub>2</sub>.

|                                                |             |
|------------------------------------------------|-------------|
| Sum of electronic and zero-point Energies (Eh) | -3678.42819 |
| Sum of electronic and thermal Energies (Eh)    | -3678.389   |

Sum of electronic and enthalpy Energies (Eh) -3678.388056

Sum of electronic and thermal Free Energies (Eh) -3678.506475

Number of Imaginary Frequencies 0

### Molecular Geometry in Cartesian Coordinates

|   |           |           |           |
|---|-----------|-----------|-----------|
| N | -1.961848 | -2.528224 | 1.374976  |
| H | -2.549579 | -2.490684 | 2.204984  |
| C | -2.271739 | -3.760717 | 0.612752  |
| H | -1.332164 | -4.113403 | 0.178324  |
| C | -2.853658 | -4.849360 | 1.490996  |
| C | -3.171138 | -3.419326 | -0.568578 |
| H | -3.784288 | -4.511586 | 1.954489  |
| H | -3.067480 | -5.740747 | 0.901230  |
| H | -2.152261 | -5.122110 | 2.280950  |
| O | -3.600158 | -4.327320 | -1.318092 |
| N | -3.372831 | -2.124293 | -0.702967 |
| C | -4.064710 | -1.548768 | -1.842026 |
| H | -3.697354 | -2.003520 | -2.770158 |
| C | -5.577142 | -1.720495 | -1.789203 |
| C | -3.702930 | -0.067227 | -1.880865 |
| H | -5.988124 | -1.261089 | -0.887579 |
| H | -6.039186 | -1.248011 | -2.657446 |
| H | -5.844750 | -2.777127 | -1.791971 |
| O | -4.097482 | 0.668093  | -2.816115 |
| N | -2.969455 | 0.311271  | -0.848711 |
| C | -2.515301 | 1.666396  | -0.647627 |
| H | -2.084759 | 2.071303  | -1.571261 |
| C | -3.663447 | 2.587027  | -0.197350 |
| C | -1.408409 | 1.608821  | 0.395583  |
| H | -4.515415 | 2.371226  | -0.845358 |
| H | -3.960554 | 2.305831  | 0.816652  |
| C | -3.354219 | 4.069999  | -0.267432 |
| O | -0.682493 | 2.612420  | 0.580527  |
| H | -2.530365 | 4.327611  | 0.402362  |
| H | -3.011343 | 4.338668  | -1.271269 |
| C | -4.509670 | 5.000866  | 0.083804  |
| O | -5.574093 | 4.513306  | 0.543898  |
| O | -4.309796 | 6.233342  | -0.103277 |
| N | -1.330271 | 0.448872  | 1.057598  |
| C | -0.312160 | 0.364043  | 2.102087  |
| H | 0.150212  | 1.348910  | 2.194807  |
| C | -0.883807 | -0.019142 | 3.452434  |
| C | 0.780803  | -0.600413 | 1.653747  |
| H | -1.375694 | -0.990926 | 3.437789  |
| H | -0.093071 | -0.052064 | 4.204559  |
| H | -1.615348 | 0.727947  | 3.762811  |
| O | 0.794286  | -1.796912 | 1.975922  |
| N | 1.720454  | -0.065335 | 0.870175  |
| H | 1.661547  | 0.912776  | 0.618768  |
| C | 2.765279  | -0.838634 | 0.237832  |
| H | 3.104888  | -1.594936 | 0.946226  |
| C | 2.284042  | -1.523411 | -1.039409 |
| C | 3.917411  | 0.100657  | -0.084424 |
| H | 1.992367  | -0.782111 | -1.785037 |
| H | 3.072087  | -2.150378 | -1.457755 |
| H | 1.423640  | -2.154837 | -0.817119 |
| O | 3.717729  | 1.299206  | -0.305323 |
| N | 5.119114  | -0.470330 | -0.144068 |

|    |           |           |           |
|----|-----------|-----------|-----------|
| H  | 5.200809  | -1.474369 | -0.043195 |
| C  | 6.311321  | 0.223787  | -0.578295 |
| H  | 6.057517  | 0.866680  | -1.426334 |
| C  | 6.899792  | 1.120348  | 0.527605  |
| C  | 7.299828  | -0.831828 | -1.057955 |
| H  | 6.054486  | 1.629289  | 0.993014  |
| H  | 7.343519  | 0.475938  | 1.293710  |
| S  | 8.101126  | 2.356515  | -0.064736 |
| O  | 7.004433  | -2.034392 | -1.065965 |
| N  | 8.473143  | -0.353950 | -1.460657 |
| H  | 9.207725  | -1.010391 | -1.681985 |
| H  | 8.683610  | 0.632239  | -1.210328 |
| H  | -0.993277 | -2.528118 | 1.701528  |
| Ni | -2.375851 | -0.962501 | 0.313618  |

**Table S8** Energies and Cartesian coordinates of the NiH<sub>3</sub>L complex with (N<sup>-</sup>,N<sup>-</sup>,N<sup>-</sup>,S<sup>-</sup>) donors in gas phase. L refers to AAEEAC-NH<sub>2</sub>.

|                                                  |              |
|--------------------------------------------------|--------------|
| Sum of electronic and zero-point Energies (Eh)   | -3677.924573 |
| Sum of electronic and thermal Energies (Eh)      | -3677.884793 |
| Sum of electronic and enthalpy Energies (Eh)     | -3677.883849 |
| Sum of electronic and thermal Free Energies (Eh) | -3678.004491 |
| Number of Imaginary Frequencies                  | 0            |

#### Molecular Geometry in Cartesian Coordinates

|   |          |           |           |
|---|----------|-----------|-----------|
| N | 8.515076 | -3.332561 | 0.715022  |
| H | 8.134274 | -3.997350 | 0.041708  |
| C | 7.365067 | -2.592721 | 1.222985  |
| H | 6.980777 | -3.132239 | 2.098772  |
| C | 7.787705 | -1.203100 | 1.667115  |
| C | 6.209155 | -2.597353 | 0.197099  |
| H | 8.100173 | -0.602188 | 0.808952  |
| H | 6.987052 | -0.660450 | 2.168752  |
| H | 8.628770 | -1.279717 | 2.359935  |
| O | 6.265279 | -3.347474 | -0.776540 |
| N | 5.184396 | -1.799002 | 0.479015  |
| H | 5.192102 | -1.126416 | 1.247452  |
| C | 4.001534 | -1.596642 | -0.326963 |
| H | 4.296011 | -1.455783 | -1.369891 |
| C | 3.020412 | -2.758290 | -0.227998 |
| C | 3.381437 | -0.286615 | 0.214871  |
| H | 2.707240 | -2.897201 | 0.808668  |
| H | 2.127786 | -2.562218 | -0.823647 |
| H | 3.492767 | -3.675058 | -0.583794 |
| O | 3.810553 | 0.171762  | 1.279330  |
| N | 2.422268 | 0.212023  | -0.538220 |
| H | 1.965661 | -0.344337 | -1.278593 |
| C | 1.487565 | 1.277605  | -0.200842 |
| H | 1.530341 | 1.425380  | 0.878311  |
| C | 1.853188 | 2.581131  | -0.925464 |
| C | 0.108953 | 0.682705  | -0.673836 |
| H | 1.758271 | 2.409117  | -2.002370 |
| H | 1.117866 | 3.348135  | -0.682243 |
| C | 3.241711 | 3.114542  | -0.603987 |
| O | 0.218631 | -0.202648 | -1.549967 |

|    |           |           |           |
|----|-----------|-----------|-----------|
| H  | 3.339481  | 3.247078  | 0.480808  |
| H  | 4.012853  | 2.391556  | -0.880485 |
| C  | 3.619699  | 4.478885  | -1.254022 |
| O  | 2.679943  | 5.230407  | -1.591304 |
| O  | 4.851809  | 4.697927  | -1.343135 |
| N  | -1.037135 | 1.097507  | -0.164487 |
| C  | -1.085514 | 2.058165  | 0.926696  |
| H  | -0.118921 | 2.187059  | 1.418406  |
| C  | -1.570563 | 3.430422  | 0.452338  |
| C  | -2.076163 | 1.573781  | 1.990766  |
| H  | -2.533668 | 3.314880  | -0.050432 |
| H  | -1.690222 | 4.099563  | 1.307879  |
| H  | -0.866235 | 3.875201  | -0.251830 |
| O  | -2.060532 | 2.039953  | 3.144917  |
| N  | -2.936243 | 0.710438  | 1.472983  |
| C  | -4.142974 | 0.301554  | 2.136389  |
| H  | -3.927143 | -0.353819 | 2.997132  |
| C  | -4.985735 | 1.469390  | 2.646016  |
| C  | -4.960576 | -0.529115 | 1.149854  |
| H  | -5.234332 | 2.132280  | 1.812705  |
| H  | -5.914787 | 1.090317  | 3.075600  |
| H  | -4.414753 | 2.033781  | 3.381907  |
| O  | -6.143482 | -0.834219 | 1.470663  |
| N  | -4.324040 | -0.834817 | 0.029807  |
| C  | -4.999849 | -1.544593 | -1.063461 |
| H  | -5.912219 | -0.984873 | -1.320273 |
| C  | -4.070164 | -1.597118 | -2.266875 |
| C  | -5.463350 | -2.986460 | -0.723032 |
| H  | -3.407140 | -2.453371 | -2.142562 |
| H  | -4.657649 | -1.785748 | -3.171856 |
| S  | -3.083629 | -0.090048 | -2.465071 |
| O  | -4.995767 | -3.988012 | -1.251512 |
| N  | -6.487796 | -3.053816 | 0.160473  |
| H  | -6.662645 | -3.978934 | 0.521455  |
| H  | -6.573198 | -2.213622 | 0.776167  |
| H  | 9.064336  | -2.694202 | 0.146151  |
| Ni | -2.745756 | 0.188819  | -0.303548 |

**Table S9** Energies and Cartesian coordinates of the NiH<sub>3</sub>L complex with (N<sup>-</sup>,N<sup>-</sup>,N<sup>-</sup>,S<sup>-</sup>) donors in water. L refers to AAEEAC-NH<sub>2</sub>.

|                                                  |              |
|--------------------------------------------------|--------------|
| Sum of electronic and zero-point Energies (Eh)   | -3678.427905 |
| Sum of electronic and thermal Energies (Eh)      | -3678.388171 |
| Sum of electronic and enthalpy Energies (Eh)     | -3678.387227 |
| Sum of electronic and thermal Free Energies (Eh) | -3678.505071 |
| Number of Imaginary Frequencies                  | 0            |

#### Molecular Geometry in Cartesian Coordinates

|   |          |           |           |
|---|----------|-----------|-----------|
| N | 8.620941 | -3.057032 | 0.608399  |
| H | 8.076656 | -3.797567 | 1.039892  |
| C | 7.823251 | -1.839761 | 0.558973  |
| H | 7.590991 | -1.546376 | 1.584455  |
| C | 8.610147 | -0.726249 | -0.109991 |
| C | 6.513698 | -2.037338 | -0.193861 |
| H | 8.867809 | -1.006060 | -1.134140 |

|    |           |           |           |
|----|-----------|-----------|-----------|
| H  | 8.035472  | 0.200620  | -0.141534 |
| H  | 9.533667  | -0.542065 | 0.440442  |
| O  | 6.487905  | -2.601894 | -1.294686 |
| N  | 5.418429  | -1.552587 | 0.395947  |
| H  | 5.490570  | -1.099267 | 1.296638  |
| C  | 4.099875  | -1.604442 | -0.194584 |
| H  | 4.205195  | -1.491802 | -1.274450 |
| C  | 3.386129  | -2.919011 | 0.106808  |
| C  | 3.297858  | -0.434489 | 0.359905  |
| H  | 3.230203  | -3.033812 | 1.180841  |
| H  | 2.418411  | -2.953566 | -0.394478 |
| H  | 3.989162  | -3.753852 | -0.251105 |
| O  | 3.540540  | 0.014880  | 1.485774  |
| N  | 2.328852  | 0.017464  | -0.432253 |
| H  | 2.186722  | -0.415371 | -1.334818 |
| C  | 1.375464  | 1.052178  | -0.070575 |
| H  | 1.450430  | 1.182069  | 1.004898  |
| C  | 1.701404  | 2.381097  | -0.760160 |
| C  | -0.015962 | 0.583355  | -0.525213 |
| H  | 1.726659  | 2.214742  | -1.839538 |
| H  | 0.878382  | 3.074191  | -0.569613 |
| C  | 3.006629  | 2.989513  | -0.287434 |
| O  | -0.061279 | 0.174782  | -1.711916 |
| H  | 2.973252  | 3.169931  | 0.791583  |
| H  | 3.835942  | 2.293315  | -0.444114 |
| C  | 3.404000  | 4.306627  | -0.947335 |
| O  | 2.654445  | 4.802626  | -1.826447 |
| O  | 4.485894  | 4.822004  | -0.552003 |
| N  | -1.061737 | 0.647785  | 0.280326  |
| C  | -0.874644 | 0.947125  | 1.703493  |
| H  | 0.043782  | 0.491191  | 2.082028  |
| C  | -0.843780 | 2.441153  | 2.013714  |
| C  | -2.008433 | 0.322889  | 2.498793  |
| H  | -1.752450 | 2.923705  | 1.646260  |
| H  | -0.775624 | 2.604282  | 3.090961  |
| H  | 0.012433  | 2.925707  | 1.543739  |
| O  | -1.907000 | 0.191097  | 3.746185  |
| N  | -3.038537 | 0.005332  | 1.750139  |
| C  | -4.290157 | -0.490577 | 2.276714  |
| H  | -4.135937 | -1.422909 | 2.834514  |
| C  | -5.015755 | 0.503105  | 3.179713  |
| C  | -5.172063 | -0.811723 | 1.083279  |
| H  | -5.198877 | 1.437587  | 2.644230  |
| H  | -5.975517 | 0.091053  | 3.494760  |
| H  | -4.427351 | 0.722827  | 4.069208  |
| O  | -6.288385 | -1.371035 | 1.254000  |
| N  | -4.661475 | -0.446621 | -0.080246 |
| C  | -5.432547 | -0.586294 | -1.310105 |
| H  | -6.493153 | -0.395345 | -1.090789 |
| C  | -4.916452 | 0.447819  | -2.284125 |
| C  | -5.427729 | -2.001714 | -1.900796 |
| H  | -5.272015 | 0.241222  | -3.293304 |
| H  | -5.302688 | 1.425266  | -1.988670 |
| S  | -3.088315 | 0.469611  | -2.265499 |
| O  | -5.363346 | -2.213475 | -3.115051 |
| N  | -5.563885 | -2.992216 | -1.013194 |
| H  | -5.680204 | -3.934426 | -1.353152 |
| H  | -5.810421 | -2.766852 | -0.054898 |
| H  | 8.797107  | -3.359790 | -0.345611 |
| Ni | -2.897124 | 0.177187  | -0.093579 |



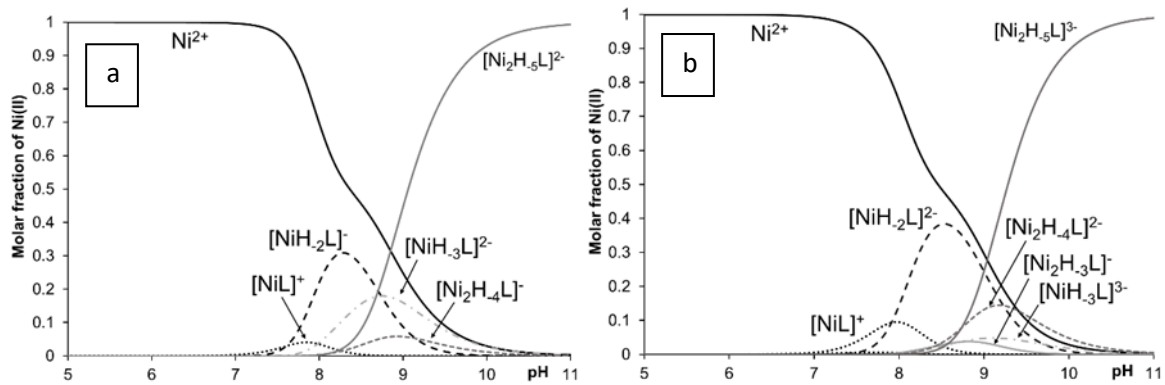

**Figure S7** Distribution curves of the nickel(II) – ligand = 2:1 system of AAASSC-NH<sub>2</sub> (a) and AAEAAC-NH<sub>2</sub> (b) ( $c_L = 10 \mu\text{M}$ ,  $c_{\text{Ni}^{2+}} = 20 \mu\text{M}$ )

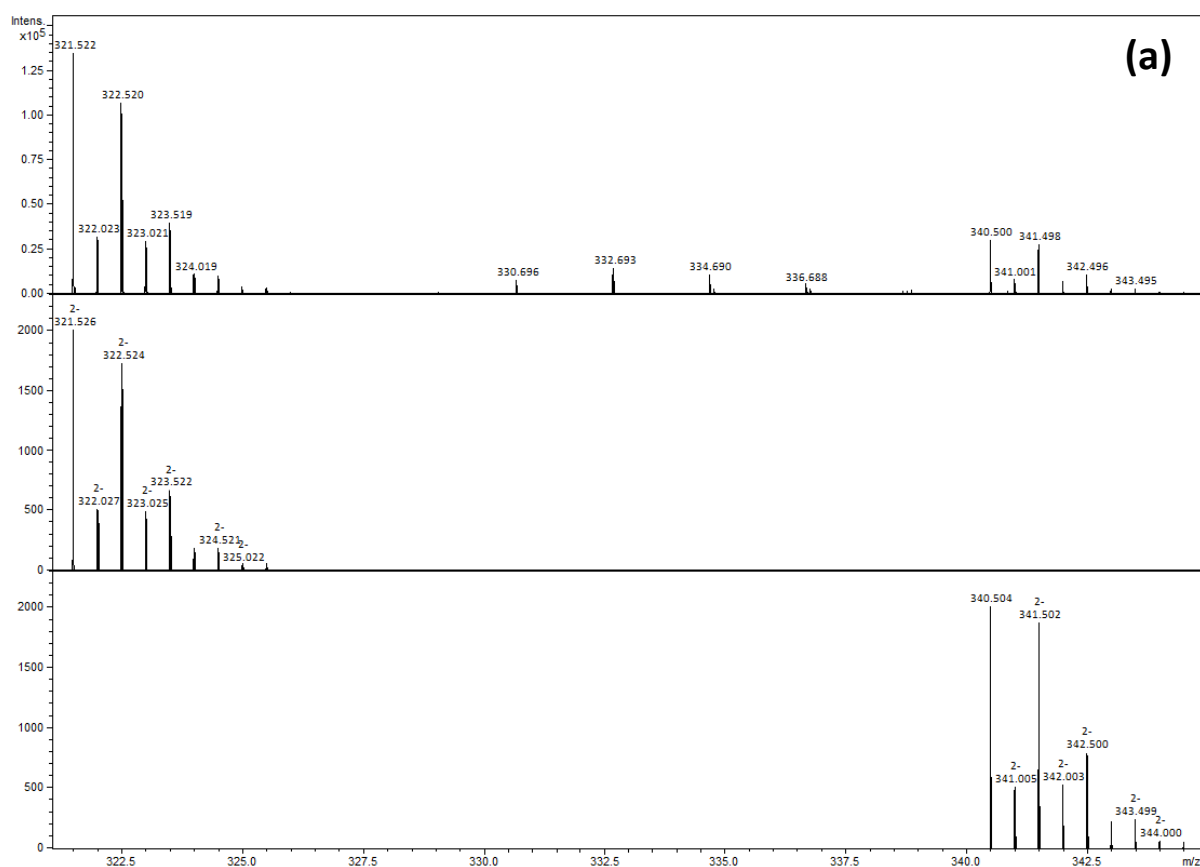

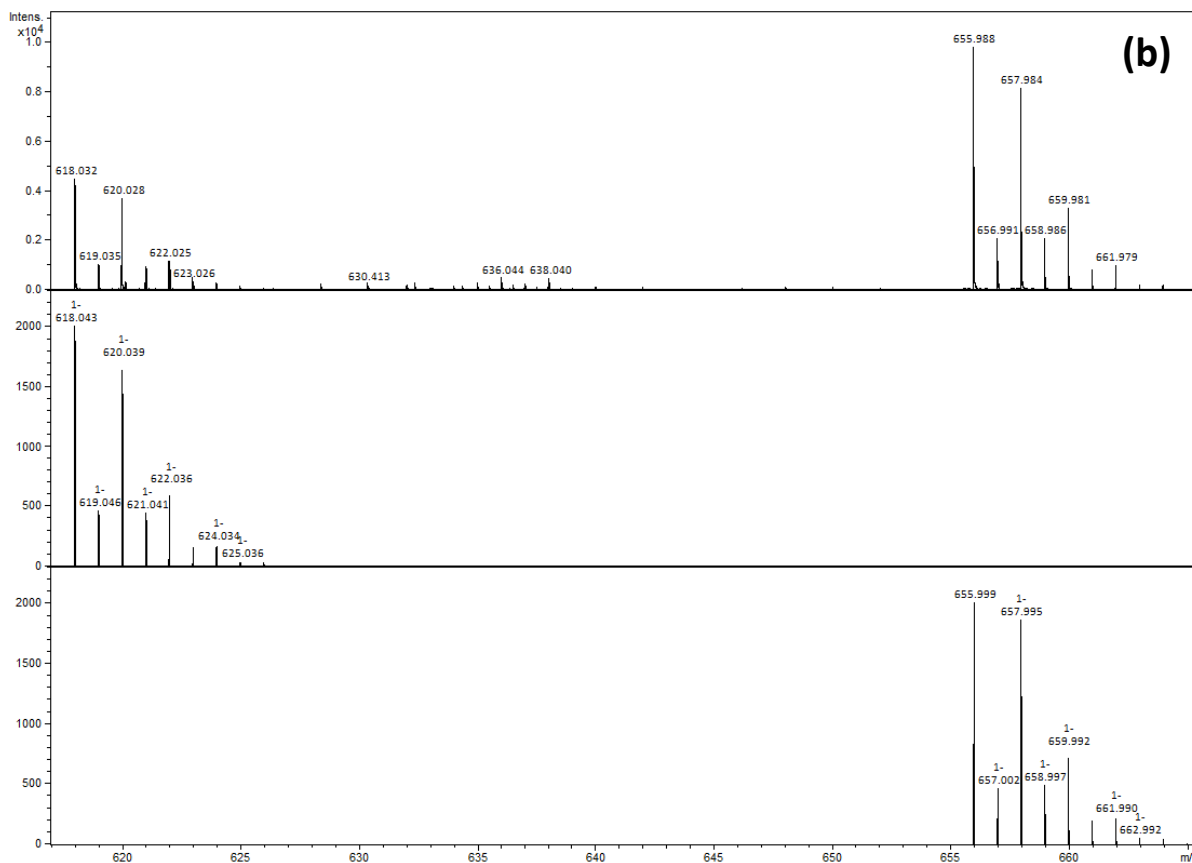

**Figure S8** ESI-MS spectra of the  $\text{Ni}_2\text{H}_{-5}\text{L}$  complexes of AAEAAC-NH<sub>2</sub> (a) and AAASSC-NH<sub>2</sub> (b) Spectra from up to bottom: measured spectrum, calculated spectra of  $[\text{M}+\text{H}^+]$  and  $[\text{M}+\text{K}^+]$  adducts

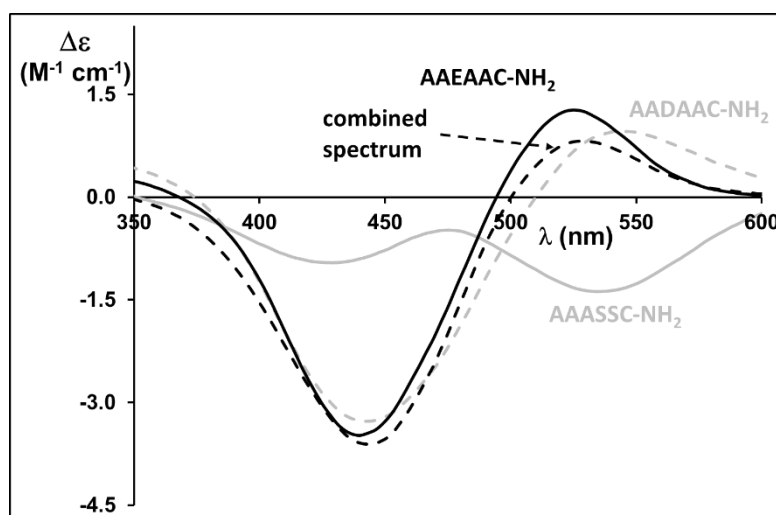

**Figure S9** CD-spectra of the nickel(II) : ligand = 2:1 systems of AAEAAC-NH<sub>2</sub>, ADAAC-NH<sub>2</sub> and AAASSC-NH<sub>2</sub> and a calculated spectrum assuming 50-50% of Ac-DAAC-NH<sub>2</sub> and AAAC-NH<sub>2</sub> representing the equal occupation of the N-terminal and C-terminal binding domains

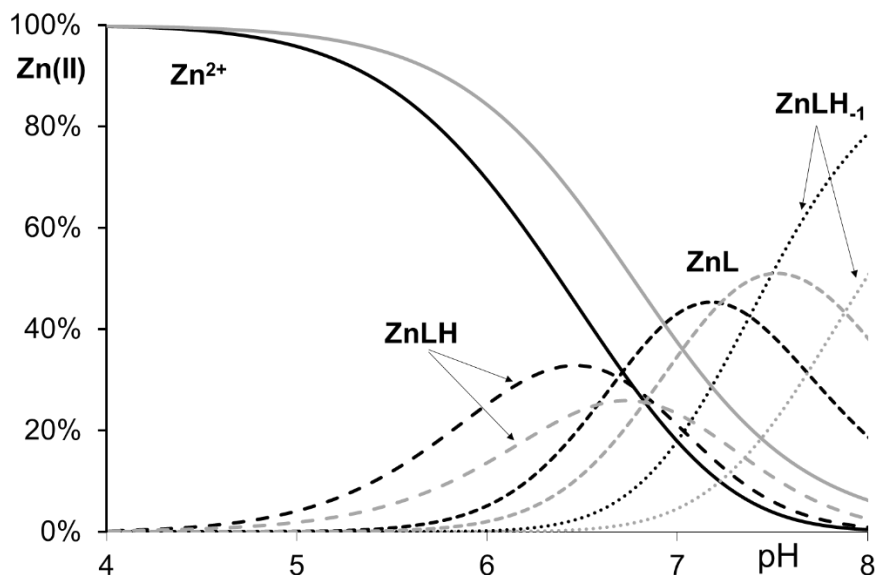

**Figure S10** Complex distribution curves of the Zn(II) – ligand equimolar systems (AAASSC-NH<sub>2</sub> – grey lines, AAEAAC-NH<sub>2</sub> – black lines;  $c_L = 2.0 \text{ mM}$ ,  $c_{Zn^{2+}} = 1.8 \text{ mM}$ )

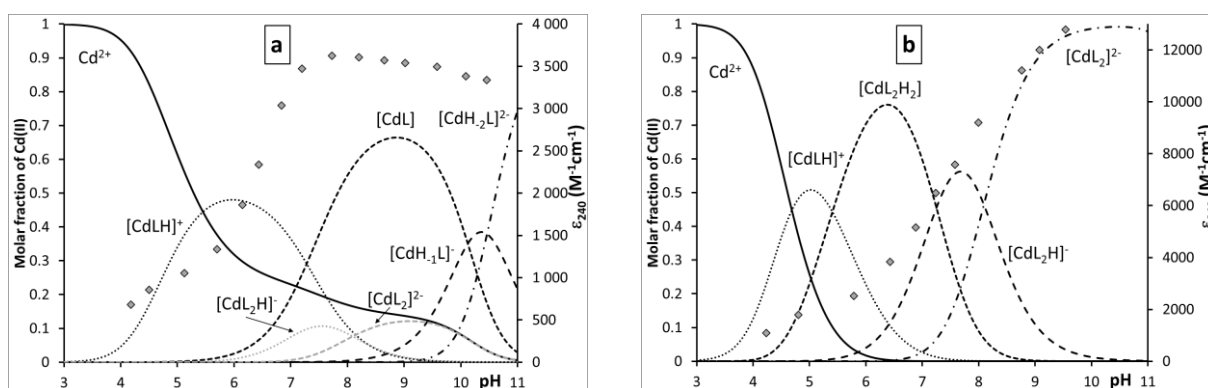

**Figure S11** Complex distribution curves of the Cd(II) – AAEAAC-NH<sub>2</sub> equimolar (a) and ligand excess containing systems (b) ( $c_L = 2.0 \text{ mM}$ ,  $c_{Zn^{2+}} = 1.8 \text{ mM}$  or  $0.70 \text{ mM}$ )

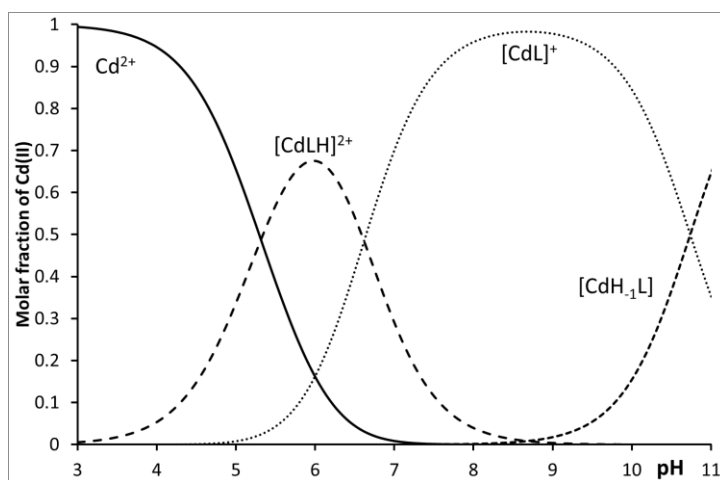

**Figure S12** Complex distribution curves of the Cd(II) – AAASSC-NH<sub>2</sub> equimolar system ( $c_L = 2.0 \text{ mM}$ ,  $c_{Zn^{2+}} = 1.8 \text{ mM}$ )

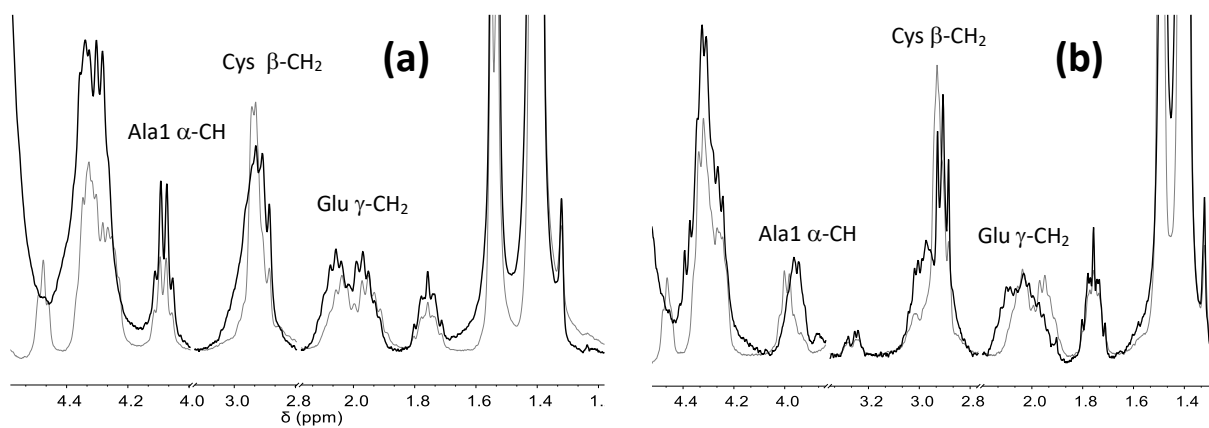

**Figure S13:**  $^1\text{H}$  NMR spectra of the free ligand AAEAAC-NH<sub>2</sub> (black) and the zinc(II) containing system (grey) at pD=6.4 (a) and pD=7.8 (b) ( $c_L = 5.0$  mM,  $c_{\text{Zn}^{2+}} = 2.5$  mM)
